# Supplementary material for: Mapping the Mine: Combining Portable X-ray Fluorescence, Spectroradiometry, UAV, and Sentinel-2 Images to Identify Contaminated Soils—Application to the Mostardeira Mine (Portugal)
Source: MDPI journal article supplement (doi:10.3390/rs15225295), 2023-11-09
Supplement: s1 [file s1]

Archive with 1 entries (1 files):
- remotesensing-2690921-supplementary.pdf
